# Supplementary material for: Multiclass Support Vector Machine-Based Lesion Mapping Predicts Functional Outcome in Ischemic Stroke Patients
Source: PubMed Central journal article supplement (PMC4476759; doi:10.1371/journal.pone.0129569), 2015-06-22
Supplement: pone.0129569.s001.pdf [file pone.0129569.s001.pdf]

## S1 Data: Confusion matrices for the twelve mRS prediction models

|              |       | Simple Model |       |       |       |       |       |
|--------------|-------|--------------|-------|-------|-------|-------|-------|
|              |       | Predicted    |       |       |       |       |       |
|              |       | mRS 0        | mRS 1 | mRS 2 | mRS 3 | mRS 4 | mRS 5 |
| Ground Truth | mRS 0 | 3            | 1     | 2     | 4     | 0     | 2     |
|              | mRS 1 | 1            | 2     | 1     | 4     | 1     | 3     |
|              | mRS 2 | 1            | 1     | 2     | 5     | 1     | 2     |
|              | mRS 3 | 2            | 1     | 2     | 3     | 3     | 1     |
|              | mRS 4 | 0            | 2     | 2     | 2     | 3     | 3     |
|              | mRS 5 | 0            | 0     | 0     | 1     | 4     | 3     |

|              |       | Extended Simple Model |       |       |       |       |       |
|--------------|-------|-----------------------|-------|-------|-------|-------|-------|
|              |       | Predicted             |       |       |       |       |       |
|              |       | mRS 0                 | mRS 1 | mRS 2 | mRS 3 | mRS 4 | mRS 5 |
| Ground Truth | mRS 0 | 2                     | 6     | 2     | 2     | 0     | 0     |
|              | mRS 1 | 2                     | 2     | 6     | 1     | 0     | 1     |
|              | mRS 2 | 0                     | 2     | 2     | 4     | 3     | 1     |
|              | mRS 3 | 1                     | 0     | 4     | 0     | 5     | 2     |
|              | mRS 4 | 0                     | 1     | 1     | 2     | 4     | 4     |
|              | mRS 5 | 0                     | 0     | 0     | 0     | 2     | 6     |

|              |       | MNI Model |       |       |       |       |       |
|--------------|-------|-----------|-------|-------|-------|-------|-------|
|              |       | Predicted |       |       |       |       |       |
|              |       | mRS 0     | mRS 1 | mRS 2 | mRS 3 | mRS 4 | mRS 5 |
| Ground Truth | mRS 0 | 7         | 3     | 2     | 0     | 0     | 0     |
|              | mRS 1 | 3         | 4     | 2     | 0     | 1     | 2     |
|              | mRS 2 | 0         | 3     | 2     | 2     | 4     | 1     |
|              | mRS 3 | 2         | 1     | 2     | 4     | 1     | 2     |
|              | mRS 4 | 1         | 2     | 2     | 1     | 4     | 2     |
|              | mRS 5 | 1         | 1     | 2     | 0     | 1     | 3     |

|              |       | Extended MNI Model |       |       |       |       |       |
|--------------|-------|--------------------|-------|-------|-------|-------|-------|
|              |       | Predicted          |       |       |       |       |       |
|              |       | mRS 0              | mRS 1 | mRS 2 | mRS 3 | mRS 4 | mRS 5 |
| Ground Truth | mRS 0 | 7                  | 3     | 1     | 1     | 0     | 0     |
|              | mRS 1 | 3                  | 6     | 2     | 0     | 1     | 0     |
|              | mRS 2 | 1                  | 2     | 5     | 1     | 2     | 1     |
|              | mRS 3 | 1                  | 1     | 1     | 6     | 2     | 1     |
|              | mRS 4 | 1                  | 1     | 1     | 3     | 1     | 5     |
|              | mRS 5 | 1                  | 0     | 1     | 2     | 2     | 2     |

|              |       | Harvard-Oxford Subcortical Model |       |       |       |       |       |
|--------------|-------|----------------------------------|-------|-------|-------|-------|-------|
|              |       | Predicted                        |       |       |       |       |       |
|              |       | mRS 0                            | mRS 1 | mRS 2 | mRS 3 | mRS 4 | mRS 5 |
| Ground Truth | mRS 0 | 6                                | 4     | 1     | 0     | 0     | 1     |
|              | mRS 1 | 6                                | 1     | 0     | 1     | 2     | 2     |
|              | mRS 2 | 2                                | 1     | 5     | 2     | 0     | 2     |
|              | mRS 3 | 0                                | 3     | 1     | 4     | 2     | 2     |
|              | mRS 4 | 0                                | 1     | 1     | 2     | 6     | 2     |
|              | mRS 5 | 0                                | 1     | 3     | 0     | 2     | 2     |

|              |       | Extended Harvard-Oxford Subcortical Model |       |       |       |       |       |
|--------------|-------|-------------------------------------------|-------|-------|-------|-------|-------|
|              |       | Predicted                                 |       |       |       |       |       |
|              |       | mRS 0                                     | mRS 1 | mRS 2 | mRS 3 | mRS 4 | mRS 5 |
| Ground Truth | mRS 0 | 6                                         | 3     | 1     | 0     | 1     | 1     |
|              | mRS 1 | 5                                         | 4     | 2     | 0     | 1     | 0     |
|              | mRS 2 | 1                                         | 0     | 8     | 1     | 2     | 0     |
|              | mRS 3 | 2                                         | 1     | 1     | 3     | 3     | 2     |
|              | mRS 4 | 1                                         | 0     | 1     | 7     | 2     | 1     |
|              | mRS 5 | 0                                         | 0     | 2     | 2     | 3     | 1     |

|              |       | Harvard-Oxford Cortical Model |       |       |       |       |       |
|--------------|-------|-------------------------------|-------|-------|-------|-------|-------|
|              |       | Predicted                     |       |       |       |       |       |
|              |       | mRS 0                         | mRS 1 | mRS 2 | mRS 3 | mRS 4 | mRS 5 |
| Ground Truth | mRS 0 | 1                             | 6     | 2     | 1     | 1     | 1     |
|              | mRS 1 | 3                             | 7     | 0     | 1     | 0     | 1     |
|              | mRS 2 | 4                             | 2     | 1     | 3     | 2     | 0     |
|              | mRS 3 | 0                             | 2     | 1     | 4     | 2     | 3     |
|              | mRS 4 | 5                             | 1     | 1     | 1     | 2     | 2     |
|              | mRS 5 | 0                             | 1     | 1     | 0     | 4     | 2     |

|              |       | Extended Harvard-Oxford Cortical Model |       |       |       |       |       |
|--------------|-------|----------------------------------------|-------|-------|-------|-------|-------|
|              |       | Predicted                              |       |       |       |       |       |
|              |       | mRS 0                                  | mRS 1 | mRS 2 | mRS 3 | mRS 4 | mRS 5 |
| Ground Truth | mRS 0 | 1                                      | 6     | 1     | 1     | 2     | 1     |
|              | mRS 1 | 3                                      | 7     | 0     | 1     | 0     | 1     |
|              | mRS 2 | 2                                      | 2     | 2     | 3     | 2     | 1     |
|              | mRS 3 | 2                                      | 1     | 2     | 5     | 0     | 2     |
|              | mRS 4 | 4                                      | 1     | 3     | 0     | 3     | 1     |
|              | mRS 5 | 0                                      | 0     | 2     | 0     | 3     | 3     |

|              |       | Problem-specific Model |       |       |       |       |       |
|--------------|-------|------------------------|-------|-------|-------|-------|-------|
|              |       | Predicted              |       |       |       |       |       |
|              |       | mRS 0                  | mRS 1 | mRS 2 | mRS 3 | mRS 4 | mRS 5 |
| Ground Truth | mRS 0 | 7                      | 1     | 1     | 1     | 2     | 0     |
|              | mRS 1 | 5                      | 2     | 1     | 1     | 2     | 1     |
|              | mRS 2 | 3                      | 2     | 4     | 2     | 0     | 1     |
|              | mRS 3 | 3                      | 2     | 2     | 5     | 0     | 0     |
|              | mRS 4 | 1                      | 3     | 0     | 2     | 4     | 2     |
|              | mRS 5 | 0                      | 1     | 0     | 1     | 0     | 6     |

|              |       | Extended Problem-specific Model |       |       |       |       |       |
|--------------|-------|---------------------------------|-------|-------|-------|-------|-------|
|              |       | Predicted                       |       |       |       |       |       |
|              |       | mRS 0                           | mRS 1 | mRS 2 | mRS 3 | mRS 4 | mRS 5 |
| Ground Truth | mRS 0 | 6                               | 3     | 3     | 0     | 0     | 0     |
|              | mRS 1 | 4                               | 7     | 0     | 1     | 0     | 0     |
|              | mRS 2 | 2                               | 1     | 8     | 1     | 0     | 0     |
|              | mRS 3 | 1                               | 0     | 4     | 4     | 2     | 1     |
|              | mRS 4 | 1                               | 1     | 0     | 3     | 7     | 0     |
|              | mRS 5 | 0                               | 1     | 0     | 1     | 0     | 6     |

|              |       | VLSM Model |       |       |       |       |       |
|--------------|-------|------------|-------|-------|-------|-------|-------|
|              |       | Predicted  |       |       |       |       |       |
|              |       | mRS 0      | mRS 1 | mRS 2 | mRS 3 | mRS 4 | mRS 5 |
| Ground Truth | mRS 0 | 7          | 1     | 1     | 1     | 2     | 0     |
|              | mRS 1 | 5          | 2     | 1     | 1     | 2     | 1     |
|              | mRS 2 | 3          | 2     | 4     | 2     | 0     | 1     |
|              | mRS 3 | 3          | 2     | 2     | 5     | 0     | 0     |
|              | mRS 4 | 1          | 3     | 0     | 2     | 4     | 2     |
|              | mRS 5 | 0          | 1     | 0     | 1     | 0     | 6     |

|              |       | Extended VLSM Model |       |       |       |       |       |
|--------------|-------|---------------------|-------|-------|-------|-------|-------|
|              |       | Predicted           |       |       |       |       |       |
|              |       | mRS 0               | mRS 1 | mRS 2 | mRS 3 | mRS 4 | mRS 5 |
| Ground Truth | mRS 0 | 6                   | 5     | 0     | 0     | 1     | 0     |
|              | mRS 1 | 4                   | 5     | 2     | 0     | 0     | 1     |
|              | mRS 2 | 6                   | 4     | 0     | 0     | 2     | 0     |
|              | mRS 3 | 6                   | 1     | 0     | 3     | 0     | 2     |
|              | mRS 4 | 8                   | 1     | 1     | 0     | 1     | 1     |
|              | mRS 5 | 3                   | 2     | 0     | 0     | 1     | 2     |
