# Supplementary material for: Multiclass Support Vector Machine-Based Lesion Mapping Predicts Functional Outcome in Ischemic Stroke Patients
Source: PubMed Central journal article supplement (PMC4476759; doi:10.1371/journal.pone.0129569), 2015-06-22

# S1 Fig: Bland–Altman plots for the different classification models

(The 95% limits of agreement are shown as two dotted lines)

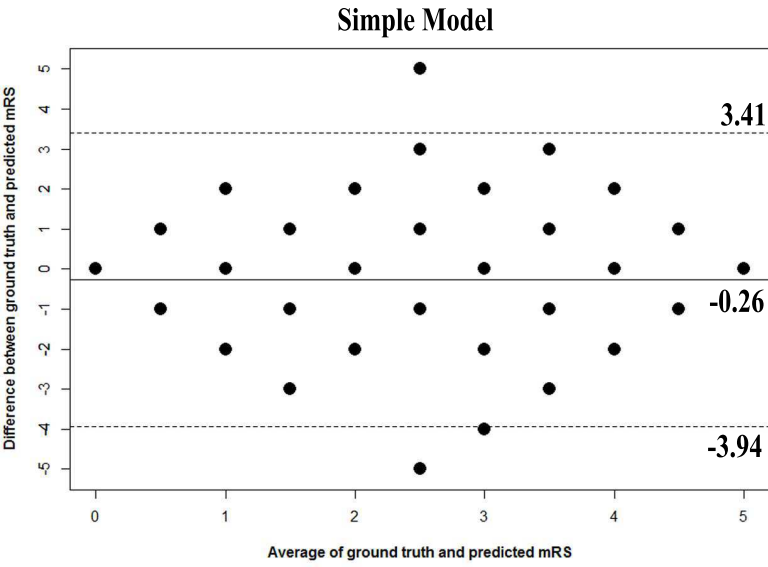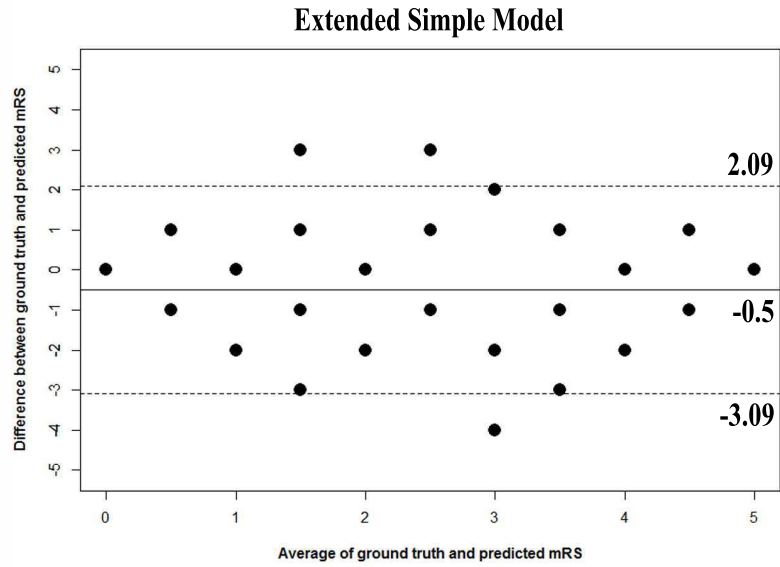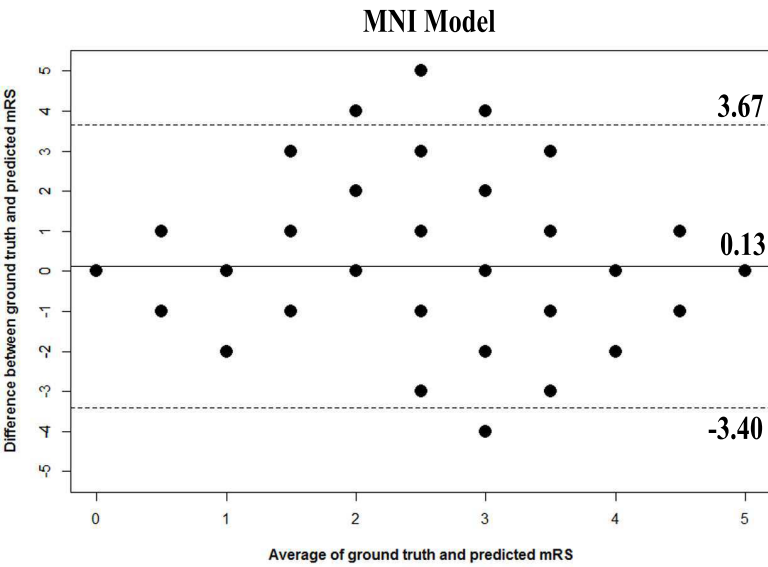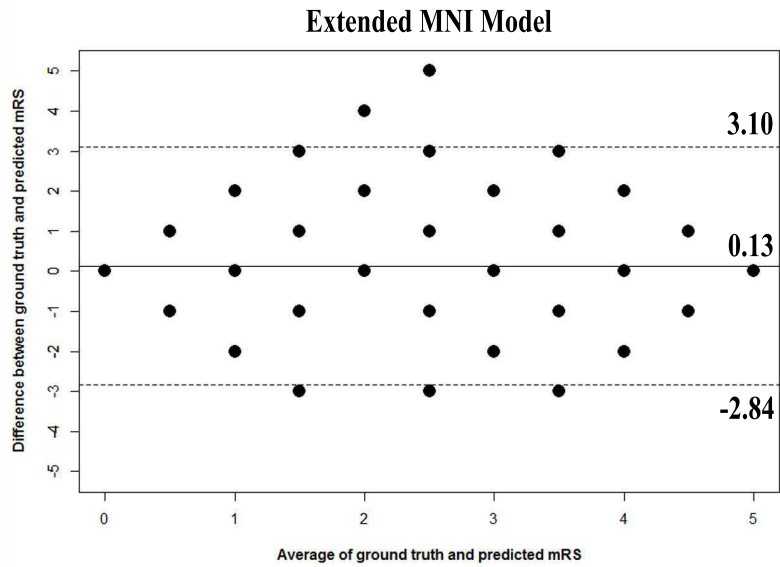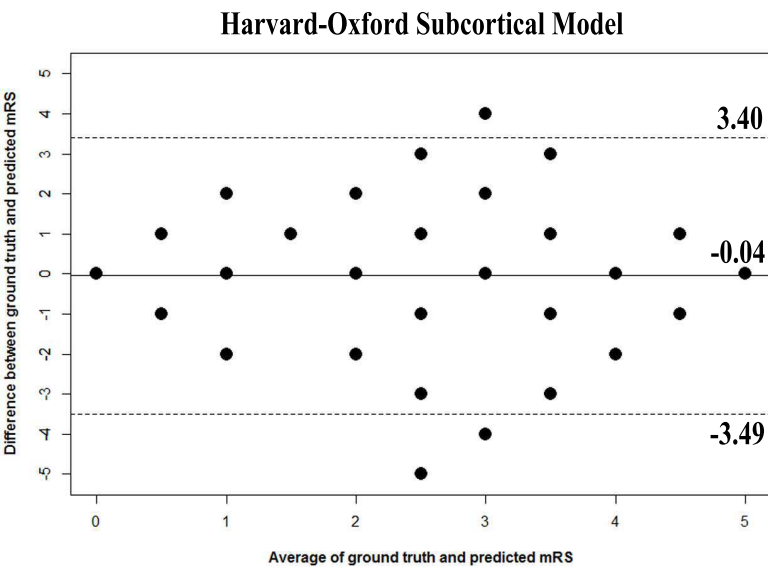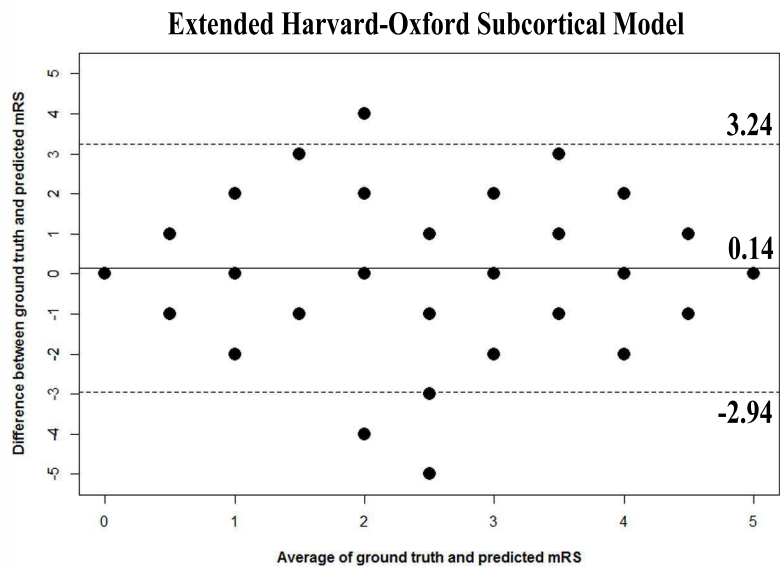

### Harvard-Oxford Cortical Model

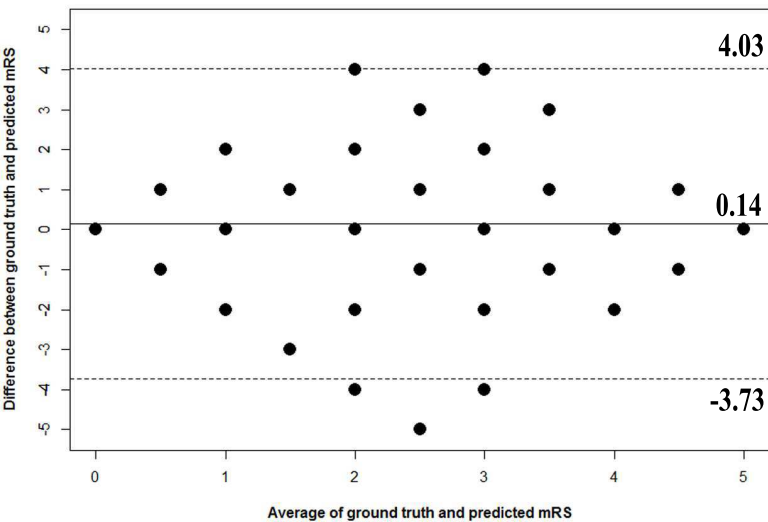

### Extended Harvard-Oxford Cortical Model

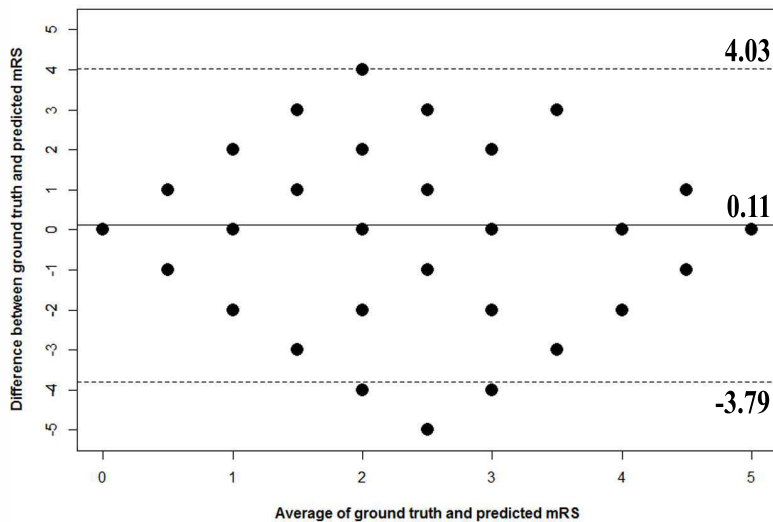

### Problem-specific Model

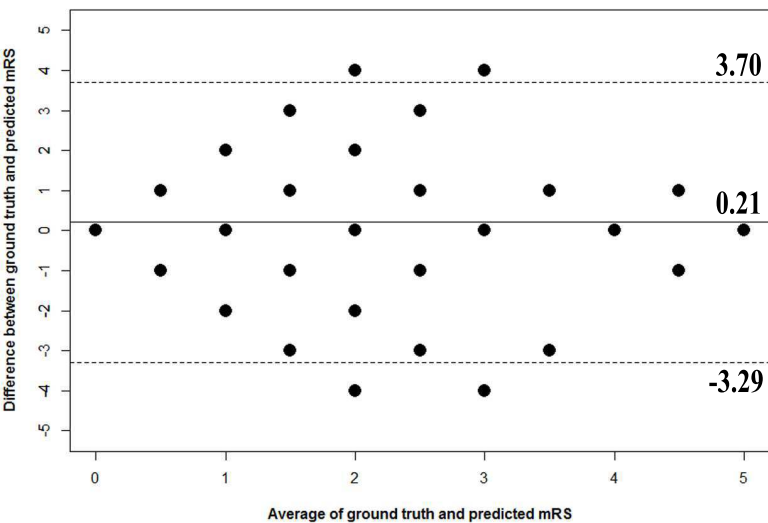

### Extended Problem-specific Model

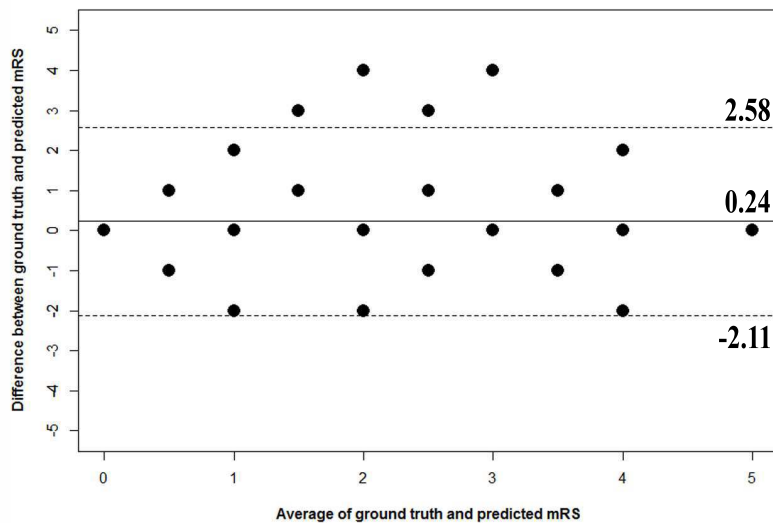

### VLSM Model

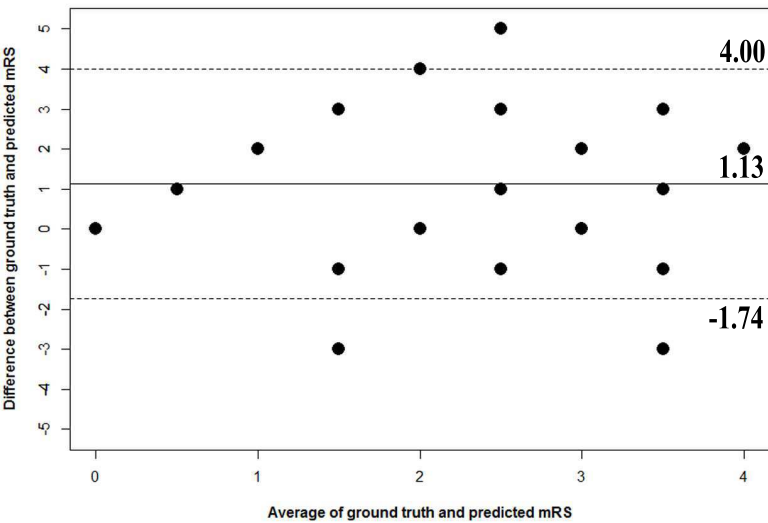

### Extended VLSM Model

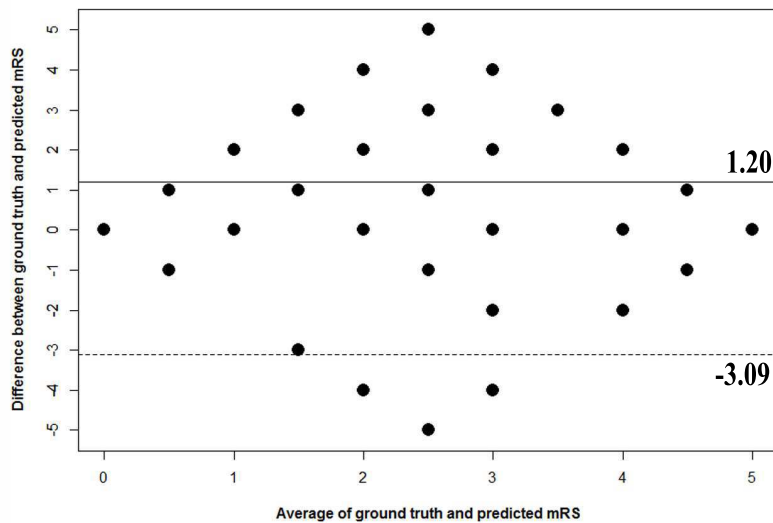

Supplement: pone.0129569.s002.pdf [file pone.0129569.s002.pdf]
