# Supplementary material for: Multiclass Support Vector Machine-Based Lesion Mapping Predicts Functional Outcome in Ischemic Stroke Patients
Source: PubMed Central journal article supplement (PMC4476759; doi:10.1371/journal.pone.0129569), 2015-06-22
Supplement: pone.0129569.s003.pdf [file pone.0129569.s003.pdf]

| Harvard-Oxford Subcortical Brain Structure      | Left                   | Right                 |
|-------------------------------------------------|------------------------|-----------------------|
| Cerebral White Matter                           | 0.623 (n=36, p<0.001)  | 0.799 (n=29, p<0.001) |
| Cerebral Cortex                                 | 0.296 (n=28, p=0.126)  | 0.682 (n=27, p<0.001) |
| Thalamus                                        | 0.147 (n=7, p=0.753)   | -0.538 (n=7, p=0.213) |
| Caudate                                         | -0.636 (n=10, p=0.048) | 0.093 (n=14, p=0.752) |
| Putamen                                         | 0.285 (n=24, p=0.177)  | 0.409 (n=23, p=0.053) |
| Pallidum                                        | 0.028 (n=11, p=0.934)  | 0.257 (n=14, p=0.374) |
| Hippocampus                                     | 0.335 (n=5, p=0.581)   | 0.347 (n=7, p=0.445)  |
| Amygdala                                        | 0.846 (n=10, p=0.002)  | 0.301 (n=9, p=0.430)  |
| Accumbens                                       | - (n=1)                | -0.600 (n=4, p=0.400) |
| Brain Stem                                      | - (n=0)                | - (n=0)               |
| Harvard-Oxford Cortical Brain Structure         | Left                   | Right                 |
| Frontal Pole                                    | - (n=2)                | -0.698 (n=6, p=0.123) |
| Insular Cortex                                  | 0.632 (n=29, p<0.001)  | 0.642 (n=25, p=0.001) |
| Superior Frontal Gyrus                          | 0.738 (n=5, p=0.155)   | -0.260 (n=8, p=0.952) |
| Middle Frontal Gyrus                            | -0.352 (n=13, p=0.239) | 0.460 (n=16, p=0.073) |
| Inferior Frontal Gyrus - pars triangularis      | -0.009 (n=11, p=0.978) | 0.542 (n=14, p=0.045) |
| Inferior Frontal Gyrus - pars opercularis       | -0.181 (n=16, p=0.503) | 0.416 (n=18, p=0.086) |
| Precentral Gyrus                                | 0.175 (n=19, p=0.475)  | 0.692 (n=20, p=0.001) |
| Temporal Pole                                   | 0.590 (n=11, p=0.056)  | 0.621 (n=13, p=0.024) |
| Superior Temporal Gyrus - anterior division     | 0.511 (n=8, p=0.196)   | 0.798 (n=10, p=0.006) |
| Superior Temporal Gyrus - posterior division    | 0.430 (n=14, p=0.125)  | 0.746 (n=11, p=0.008) |
| Middle Temporal Gyrus - anterior division       | 0.335 (n=7, p=0.463)   | 0.354 (n=5, p=0.559)  |
| Middle Temporal Gyrus - posterior division      | 0.838 (n=9, p=0.005)   | 0.000 (n=5, p=1.000)  |
| Middle Temporal Gyrus - temporooccipital part   | 0.274 (n=9, p=0.476)   | 0.393 (n=6, p=0.441)  |
| Inferior Temporal Gyrus - anterior division     | -0.304 (n=6, p=0.558)  | - (n=2)               |
| Inferior Temporal Gyrus - posterior division    | 0.034 (n=6, p=0.949)   | 0.354 (n=5, p=0.559)  |
| Inferior Temporal Gyrus - temporooccipital part | - (n=2)                | 0.676 (n=6, p=0.140)  |
| Postcentral Gyrus                               | 0.389 (n=15, p=0.152)  | 0.402 (n=16, p=0.122) |
| Superior Parietal Lobule                        | 0.281 (n=7, p=0.542)   | 0.270 (n=12, p=0.396) |
| Supramarginal Gyrus - anterior division         | 0.102 (n=13, p=0.741)  | 0.287 (n=12, p=0.367) |
| Supramarginal Gyrus - posterior division        | 0.318 (n=14, p=0.268)  | 0.506 (n=12, p=0.093) |
| Angular Gyrus                                   | 0.251 (n=11, p=0.456)  | 0.538 (n=11, p=0.088) |
| Lateral Occipital Cortex - superior division    | 0.433 (n=9, p=0.244)   | 0.663 (n=9, p=0.051)  |
| Lateral Occipital Cortex - inferior division    | 0.441 (n=6, p=0.381)   | 0.808 (n=7, p=0.028)  |
| Intracalcarine Cortex                           | 0.224 (n=5, p=0.718)   | -0.338 (n=6, p=0.512) |
| Frontal Medial Cortex                           | - (n=0)                | - (n=0)               |
| Juxtapositional Lobule Cortex                   | 0.866 (n=5, p=0.058)   | - (n=3)               |
| Subcallosal Cortex                              | - (n=0)                | -0.316 (n=4, p=0.684) |
| Paracingulate Gyrus                             | - (n=0)                | - (n=0)               |
| Cingulate Gyrus - anterior division             | - (n=3)                | - (n=3)               |
| Cingulate Gyrus - posterior division            | - (n=3)                | -0.632 (n=4, p=0.368) |
| Precuneus Cortex                                | 0.283 (n=9, p=0.460)   | 0.507 (n=6, p=0.305)  |
| Cuneal Cortex                                   | - (n=2)                | 0.354 (n=5, p=0.559)  |
| Frontal Orbital Cortex                          | 0.475 (n=10, p=0.165)  | 0.044 (n=16, p=0.871) |
| Parahippocampal Gyrus - anterior division       | 0.717 (n=11, p=0.013)  | 0.309 (n=6, p=0.552)  |
| Parahippocampal Gyrus - posterior division      | -0.224 (n=5, p=0.718)  | 0.316 (n=4, p=0.684)  |
| Lingual Gyrus                                   | - (n=2)                | 0.000 (n=5, p=1.000)  |
| Temporal Fusiform Cortex - anterior division    | -0.707 (n=5, p=0.182)  | - (n=2)               |
| Temporal Fusiform Cortex - posterior division   | -0.169 (n=6, p=0.749)  | 0.894 (n=5, p=0.041)  |
| Temporal Occipital Fusiform Cortex              | - (n=3)                | - (n=2)               |
| Occipital Fusiform Gyrus                        | - (n=2)                | -0.205 (n=5, p=0.741) |
| Frontal Operculum Cortex                        | 0.180 (n=17, p=0.490)  | 0.349 (n=19, p=0.143) |
| Central Opercular Cortex                        | 0.354 (n=26, p=0.076)  | 0.417 (n=22, p=0.054) |
| Parietal Operculum Cortex                       | 0.355 (n=18, p=0.148)  | 0.248 (n=14, p=0.394) |
| Planum Polare                                   | 0.599 (n=14, p=0.024)  | 0.637 (n=16, p=0.008) |
| Heschls Gyrus                                   | 0.030 (n=17, p=0.908)  | 0.280 (n=16, p=0.293) |
| Planum Temporale                                | 0.164 (n=17, p=0.528)  | 0.513 (n=15, p=0.050) |
| Supracalcarine Cortex                           | - (n=3)                | 0.000 (n=5, p=1.000)  |
| Occipital Pole                                  | - (n=2)                | -0.200 (n=4, p=0.800) |

**S1 Table:** Correlation coefficients between the follow-up mRS outcome and the lesion overlap measures of the predefined Harvard-Oxford brain structure VOIs.
